# Supplementary material for: Factors predicting home medication management practices among chronically ill older population of selected districts of Nepal
Source: Springer Nature journal article supplement (doi:10.1186/s12877-019-1081-7), 2019-02-27
Supplement: MOESM1 [file 16513814]

# DATA COLLECTION TOOL

## Section 1: Socio-demographic information of patients

- 1) Age: .....
- 2) Sex: a. Male:  b. Female:
- 3) Education:
- a. Never went school:  c. Secondary:  e. ≥Graduation:
- b. Primary:  d. Higher-secondary:
- 4) Occupation:
- a. Unemployed:  b. Government job:
- c. Private job:  d. Business:
- 5) Marital status:
- a. Unmarried:  c. Divorced:  e. Separated:
- b. Married:  d. Widowed:

## Section 2: Illness characteristics

- 6) Type of diseases
- a. Asthma:  c. Hypertension:  e. Rheumatic Arthritis:
- b. Diabetes:  d. Heart diseases:  f. other: \_\_\_\_\_
- 7) Duration of diseases
- a. More than 3 months  b. More than 6 months
- b. More than 9 months  c. More than 1 year
- 8) Symptoms \_\_\_\_\_
- 9) Severity of diseases
- a. Mild  b. Moderate  c. Severe

## Section 3: Life styles

- 10) Do you take oily/spicy food? a. Yes  b. No
- 11) Do you take alcohol? a. Yes  b. No
- 12) Do you smoke? a. Yes  b. No
- 13) Do you do exercise? a. Yes  b. No

## Section 4: Medication Management

- 14) Have medication administration schedule? a. Yes  b. No
- 15) Presence of medication hoarding that were discontinued? a. Yes  b. No
- 16) Presence of expired medicine(s)? a. Yes  b. No
- 17) Had multiple prescribers for a disease condition? a. Yes  b. No
- 18) Was the route of administration appropriate? a. Yes  b. No
- 19) Storage condition of medicines?
- a. Appropriate
- b. Inappropriate  (Please tick why inappropriate)
- no specific location  multiple areas
- wrong container  inappropriate location
- 20) Is there any medication duplication? a. Yes  b. No
